# Supplementary material
Source: Springer Nature journal article supplement (https://www.springermedizin.de/resource/supplementary/13054_2012_999_MOESM4_ESM.pdf/9709812)

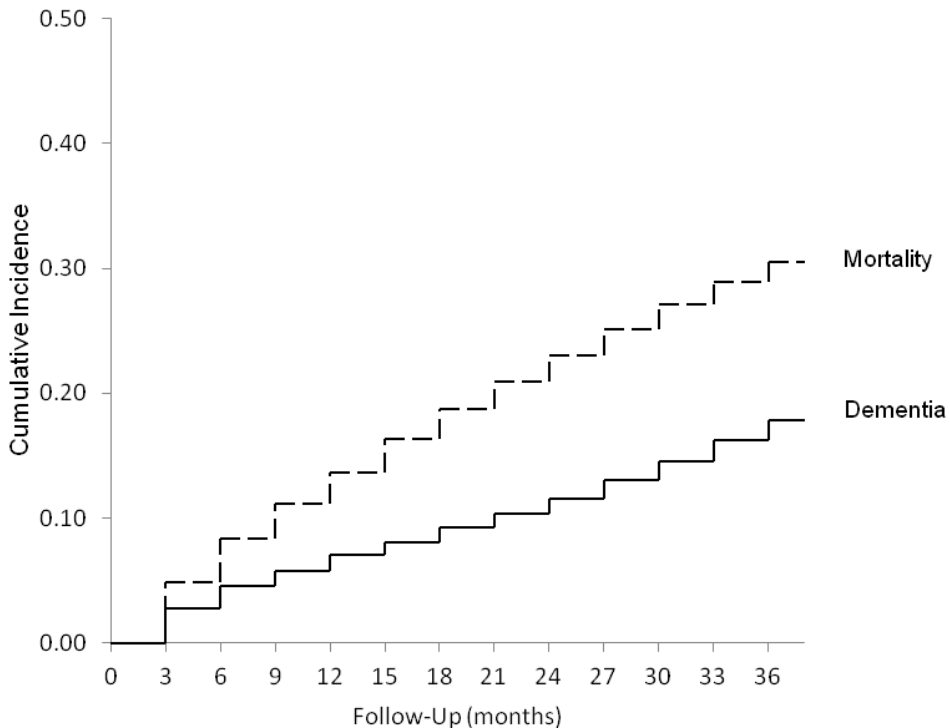

Number of ICU Survivors At Risk  
MONTH

|                                | 0      | 12     | 24     | 36     |
|--------------------------------|--------|--------|--------|--------|
| Alive with or without dementia | 25,368 | 21,907 | 19,532 | 17,622 |
| Alive with no dementia         | 25,368 | 20,682 | 17,868 | 15,050 |

Supplement: MOESM4 [file 9709812]
